# Supplementary material for: Deficiency of parkin causes neurodegeneration and accumulation of pathological α-synuclein in monkey models
Source: JCI journal article supplement (doi:10.1172/jci179633), 2024-10-14
Supplement: sd2 [file 2]

## Full unedited blot/gel

We normally used the same samples to run western blotting multiple times in independent experiments. Western blotting can analyze multiple proteins on the same blot for quantification and rigorous evaluation of the relative levels of detected proteins. Therefore, it is common practice to section the blot into strips containing proteins of varying molecular weights, each probed with different antibodies. A blot was also stripped to allow for additional probing with different antibodies. This method not only conserves precious samples obtained from small brain regions or limited non-human primate tissues but also enhances the efficiency of analysis.

When repeating the same samples using different gels, we typically also probed the same blot with antibodies for housekeeping gene products (such as vinculin, GAPDH, and others) to ensure an unbiased comparison of results from different gels under consistent conditions. For some proteins that do not exhibit changes in Parkin or PINK1 knocked down tissues, we also incorporated loading controls in the unedited blots. However, we specified that certain loading controls were omitted from the main figures due to space constraints or the presence of other protein bands that could serve as loading controls.

The following unedited blot/gel images are for the representative results in the manuscript.

Fig 1C

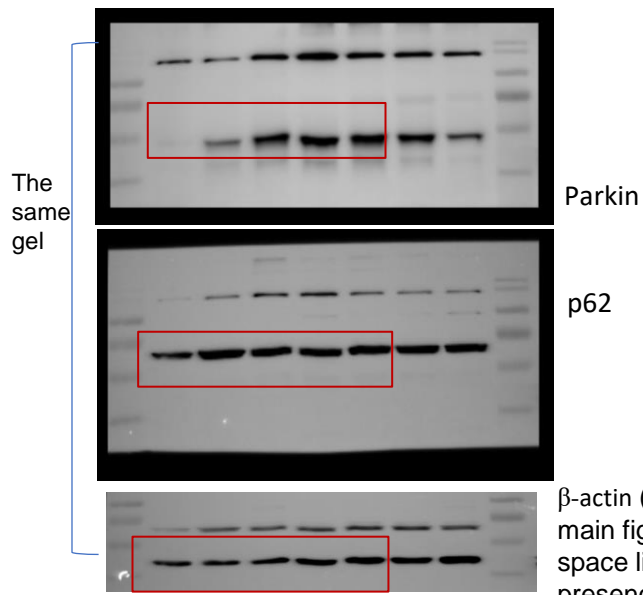

$\beta$ -actin (not included in main figure because of space limitations and the presence of other similar loading control)

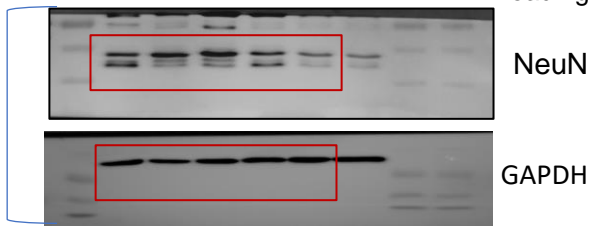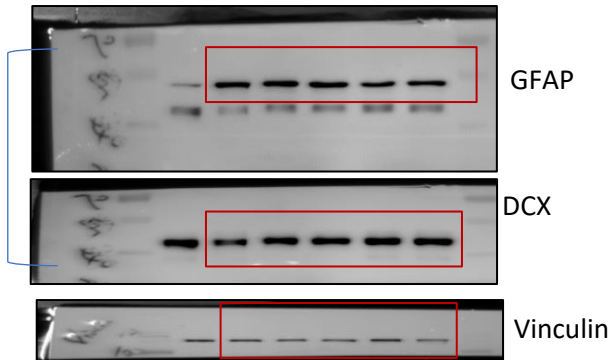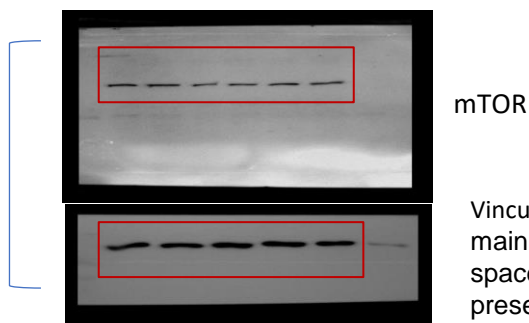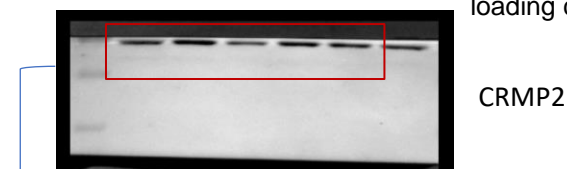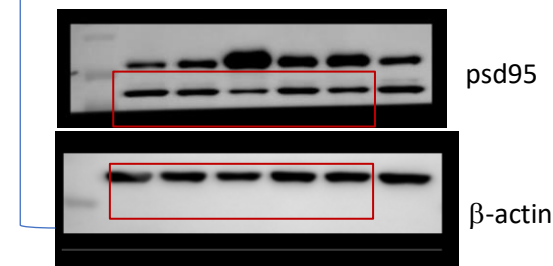

Fig 1D

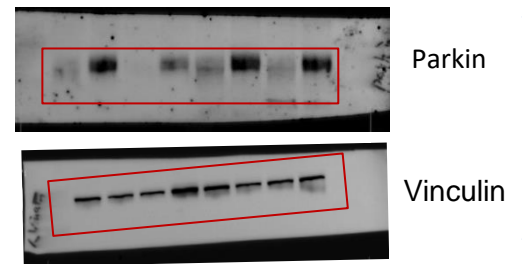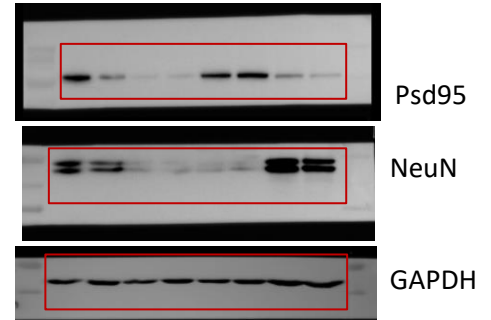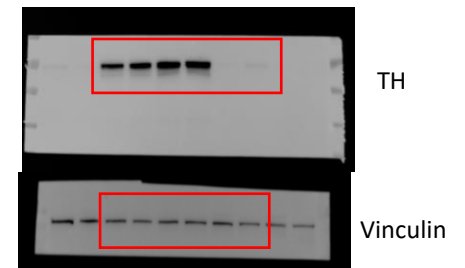

Fig. 1G

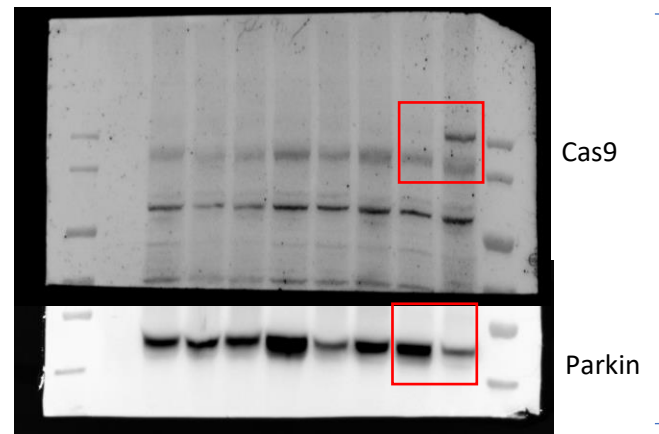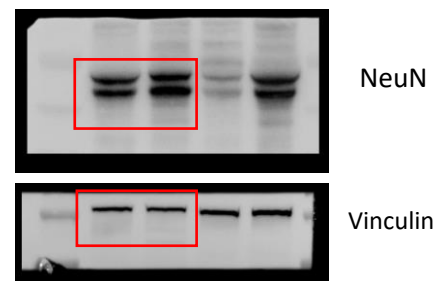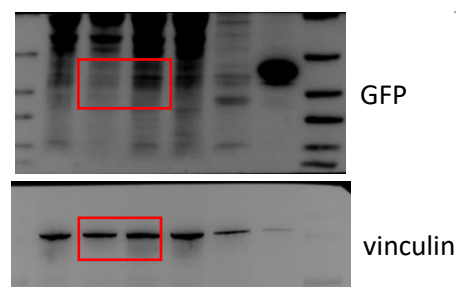

Fig 3C

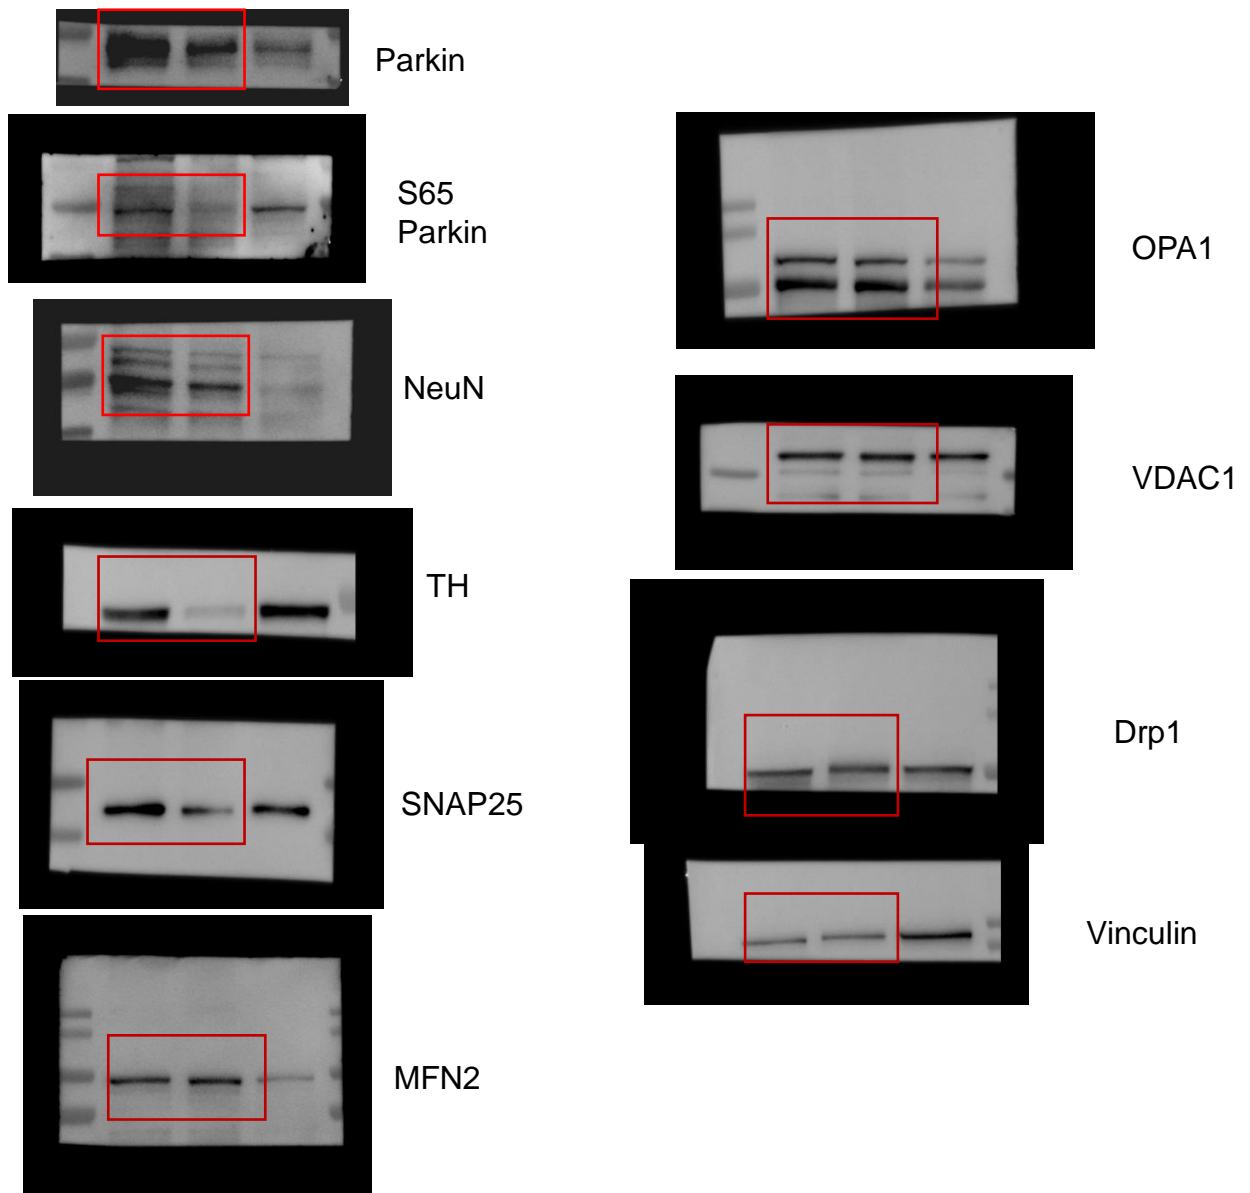

Fig. 4B

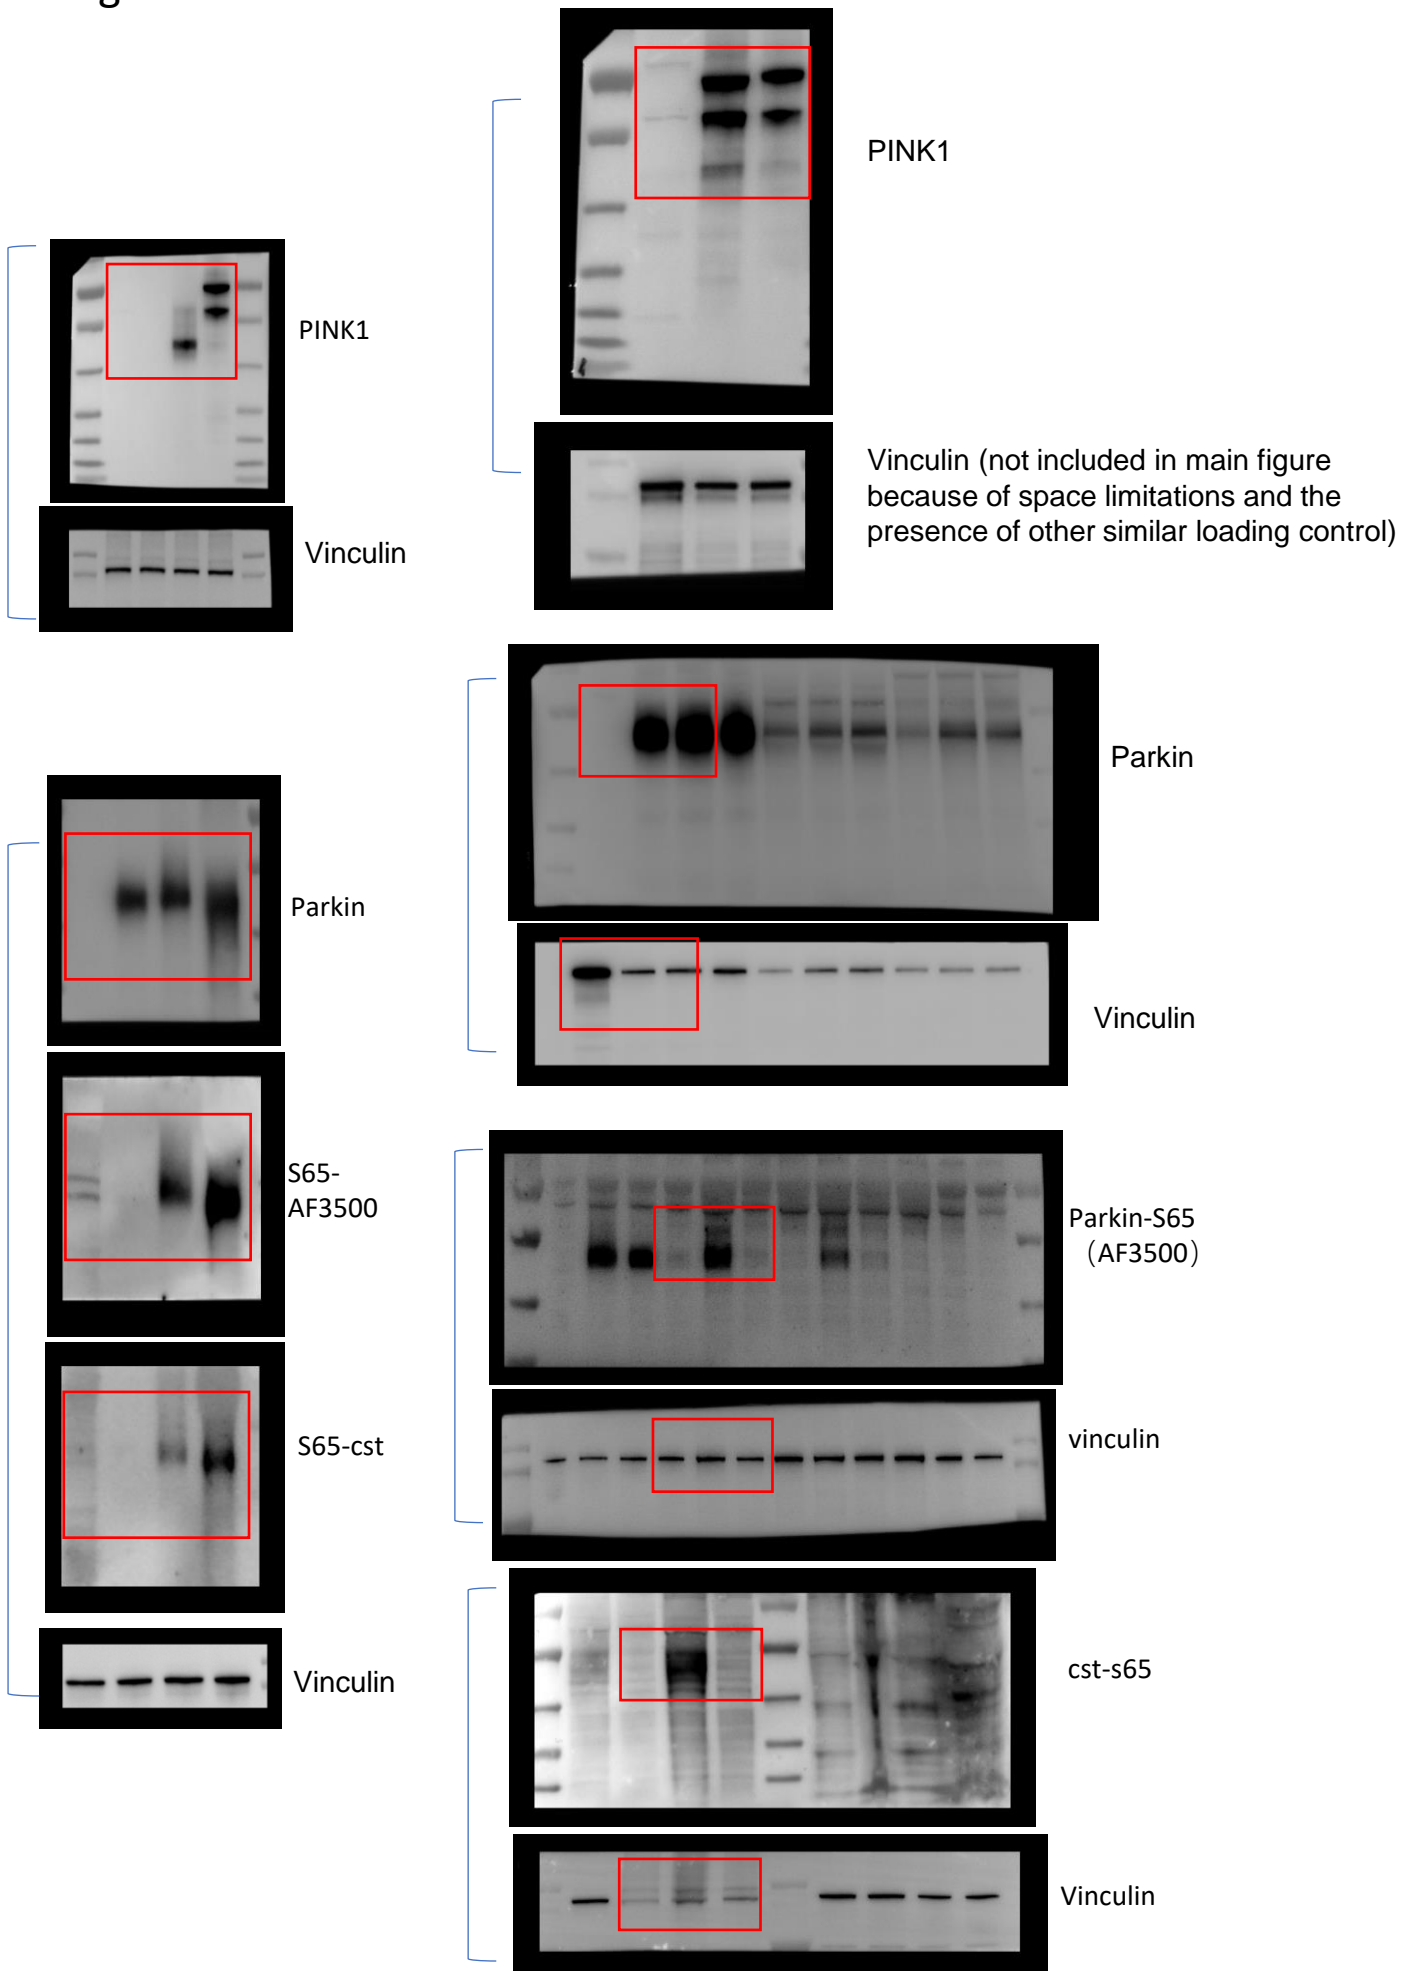

Fig. 4C

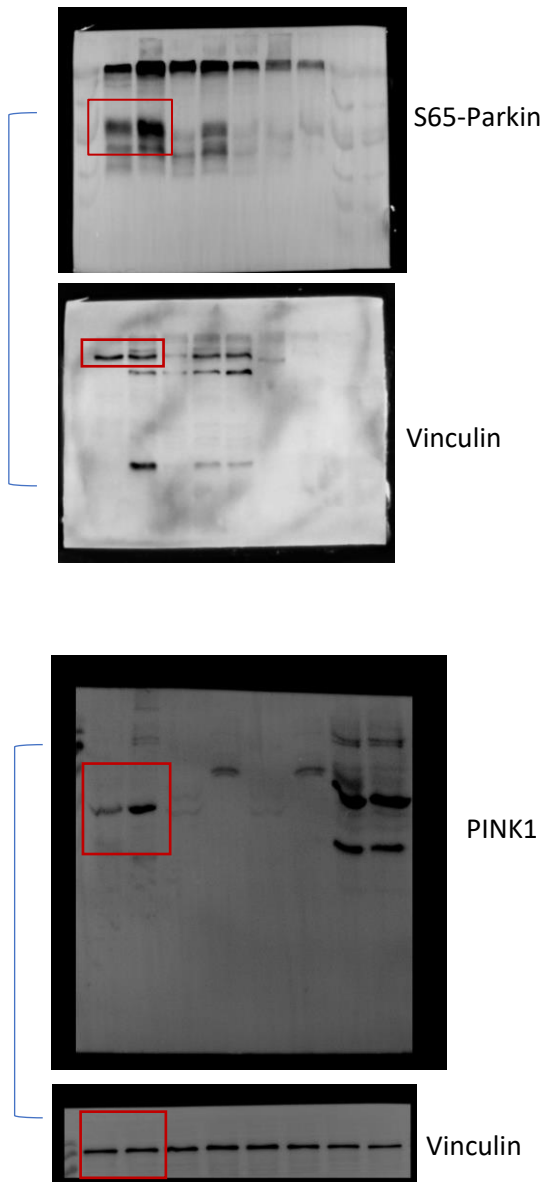

Fig. 4D

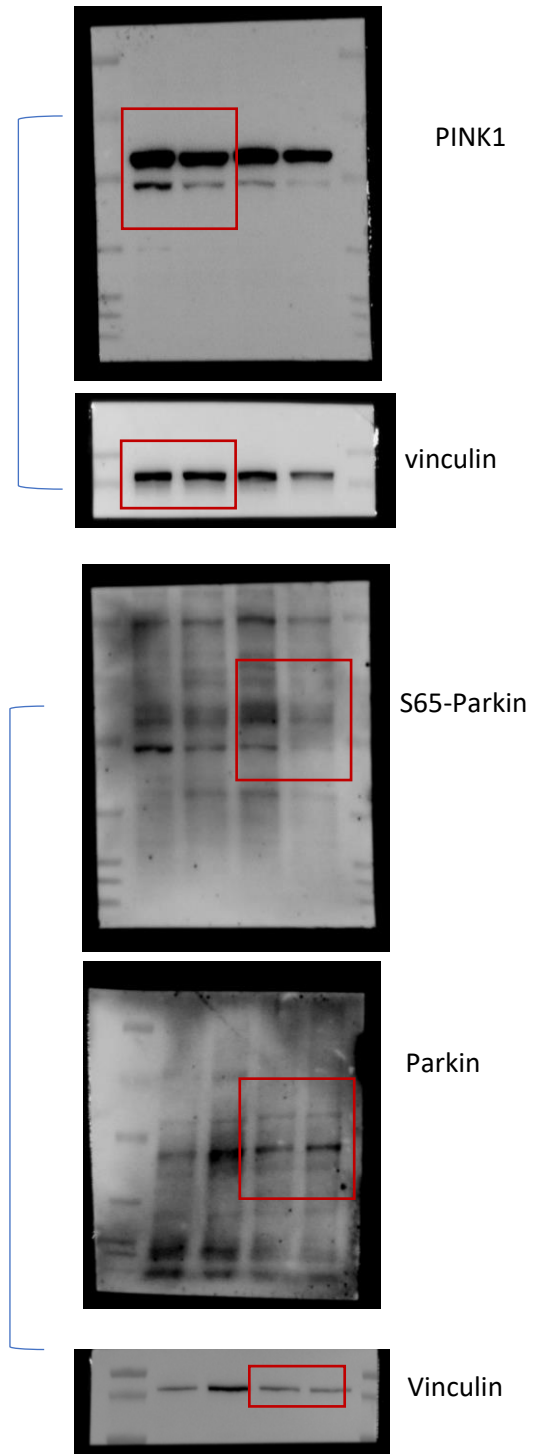

Fig. 4E

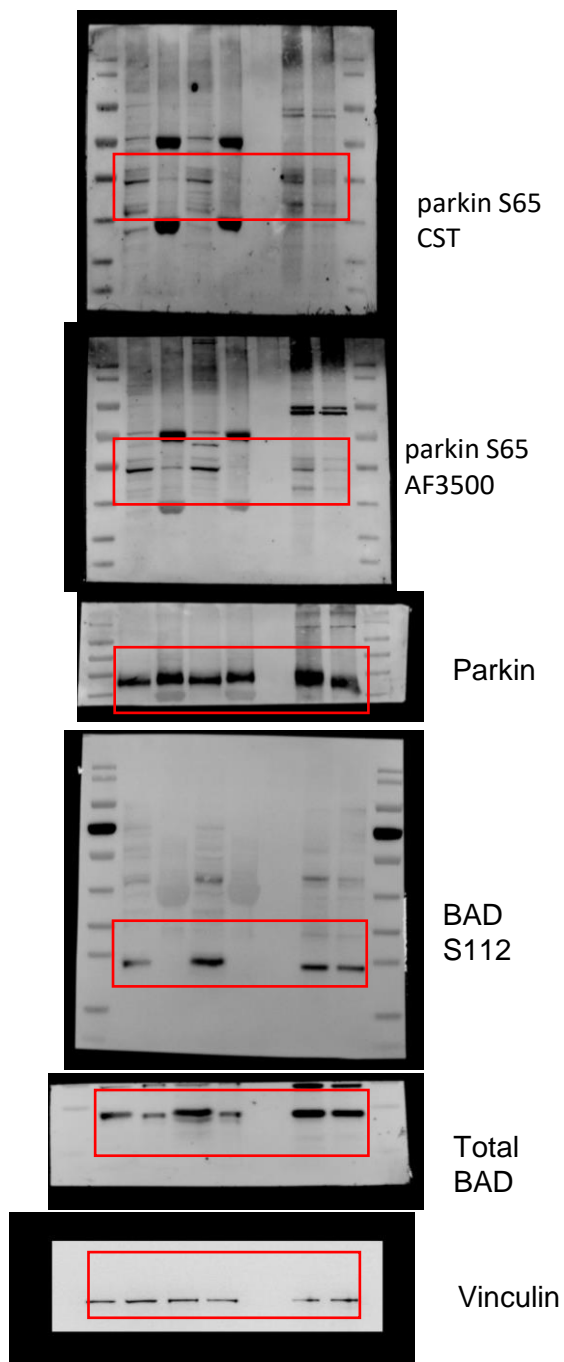

Figure 4F

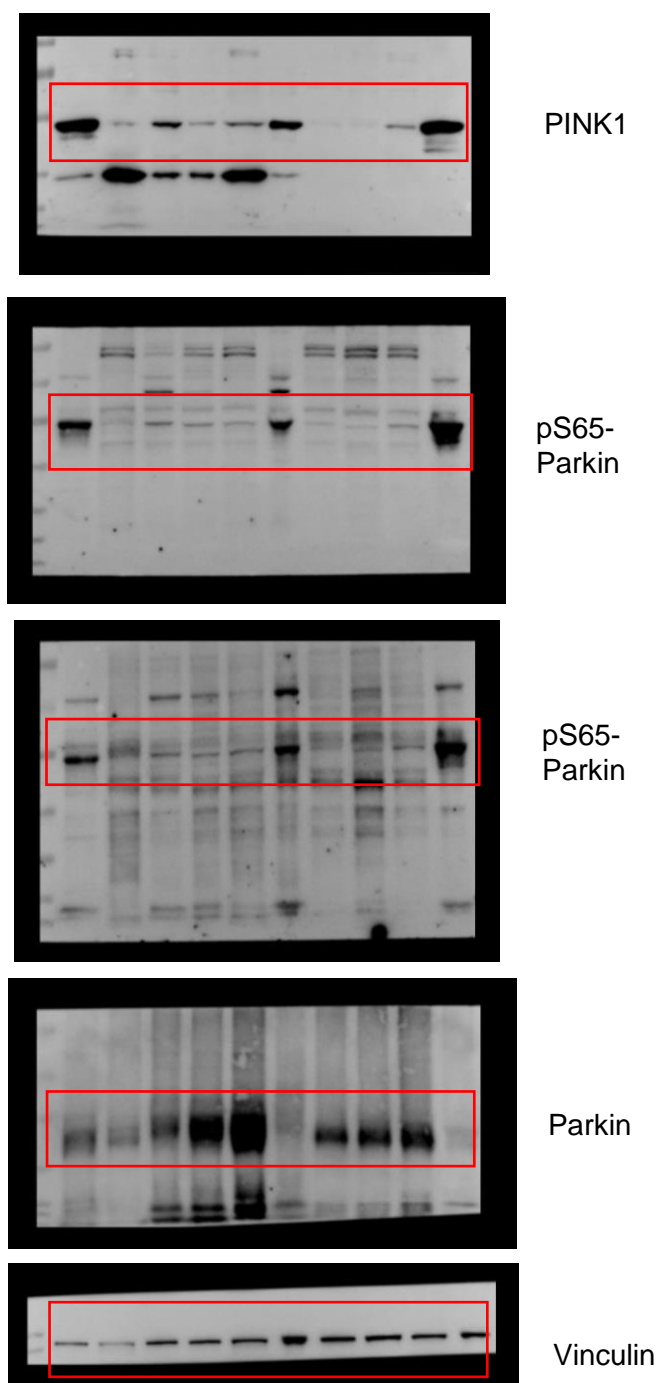

Fig 4G

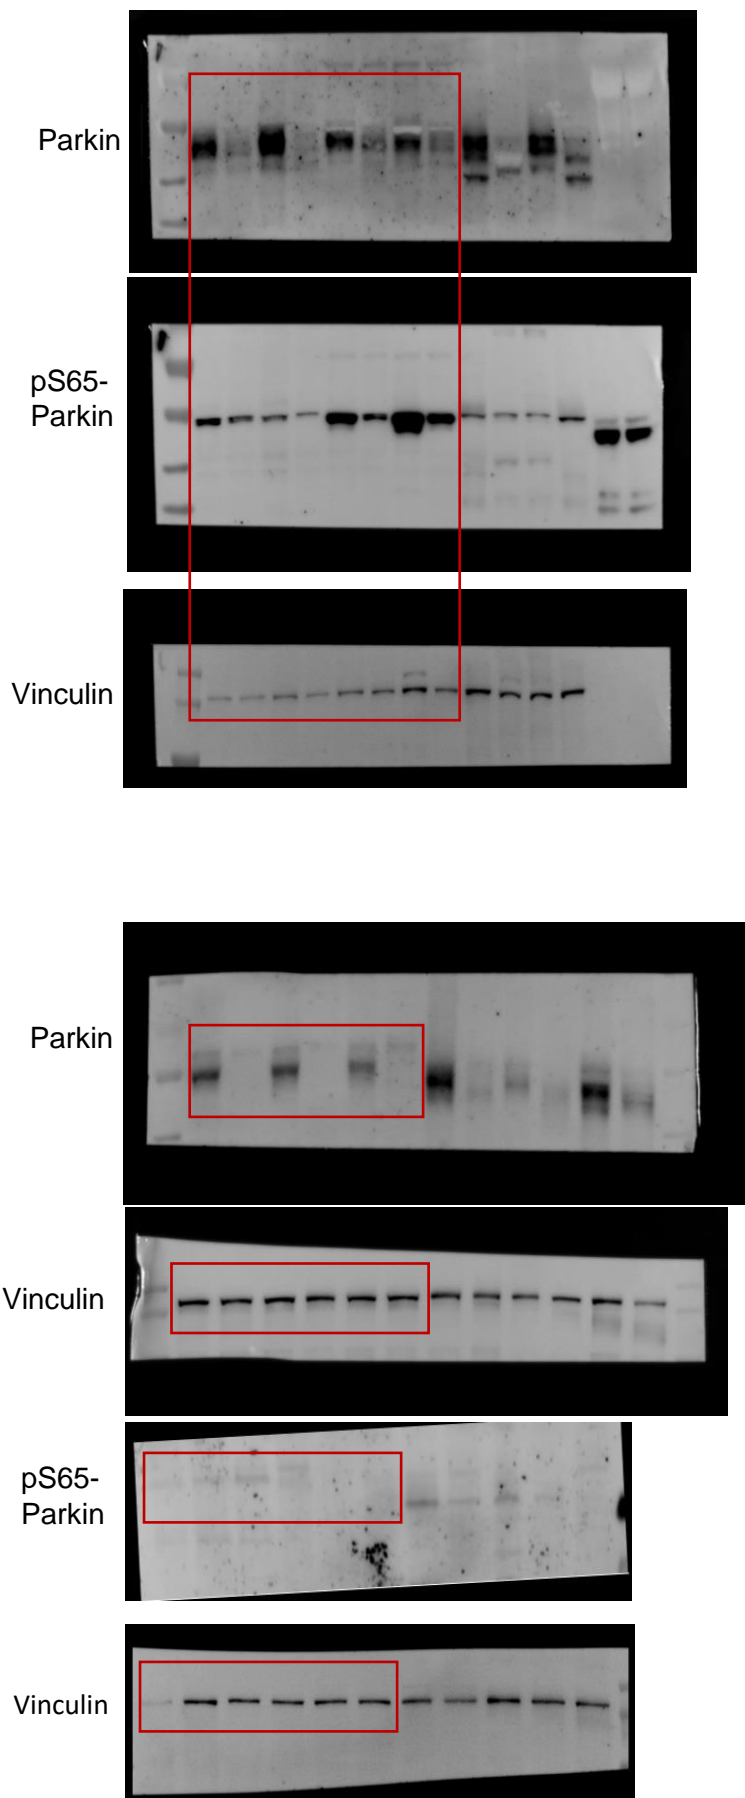

Fig. 5C

pS65-Parkin

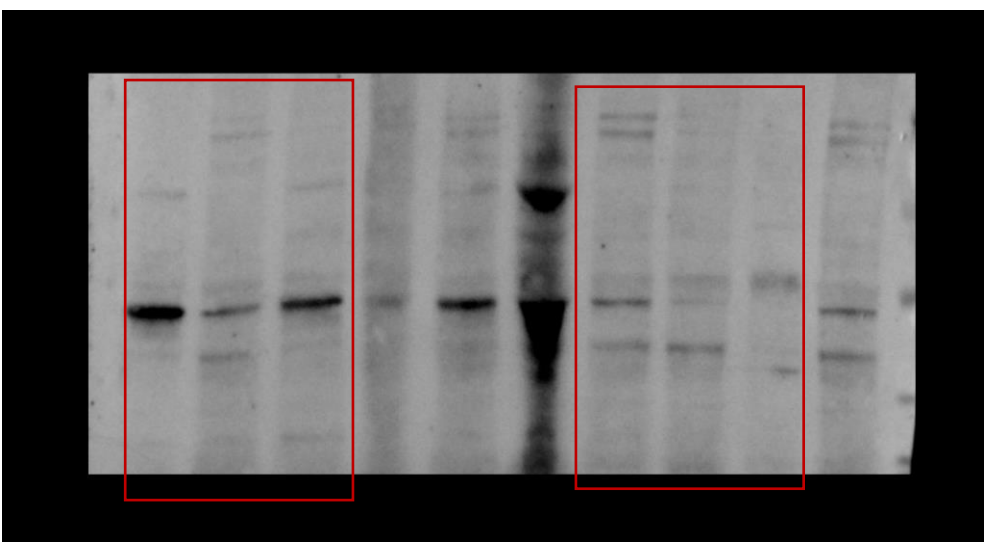

Vinculin

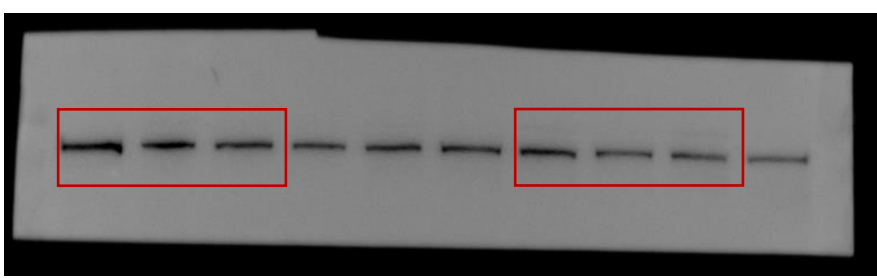

Fig 5D

Parkin

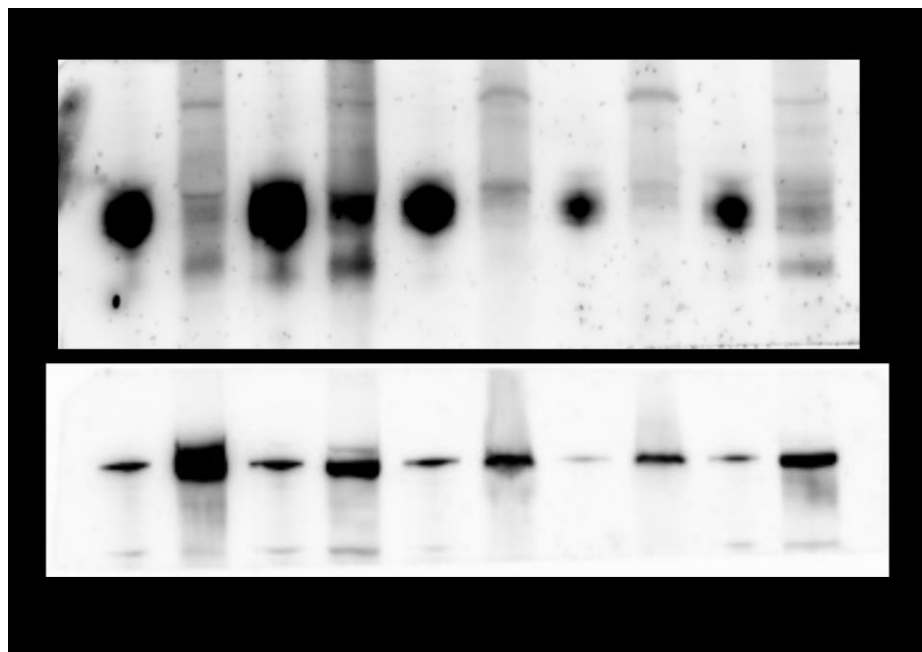

Vinculin



Fig. 5E

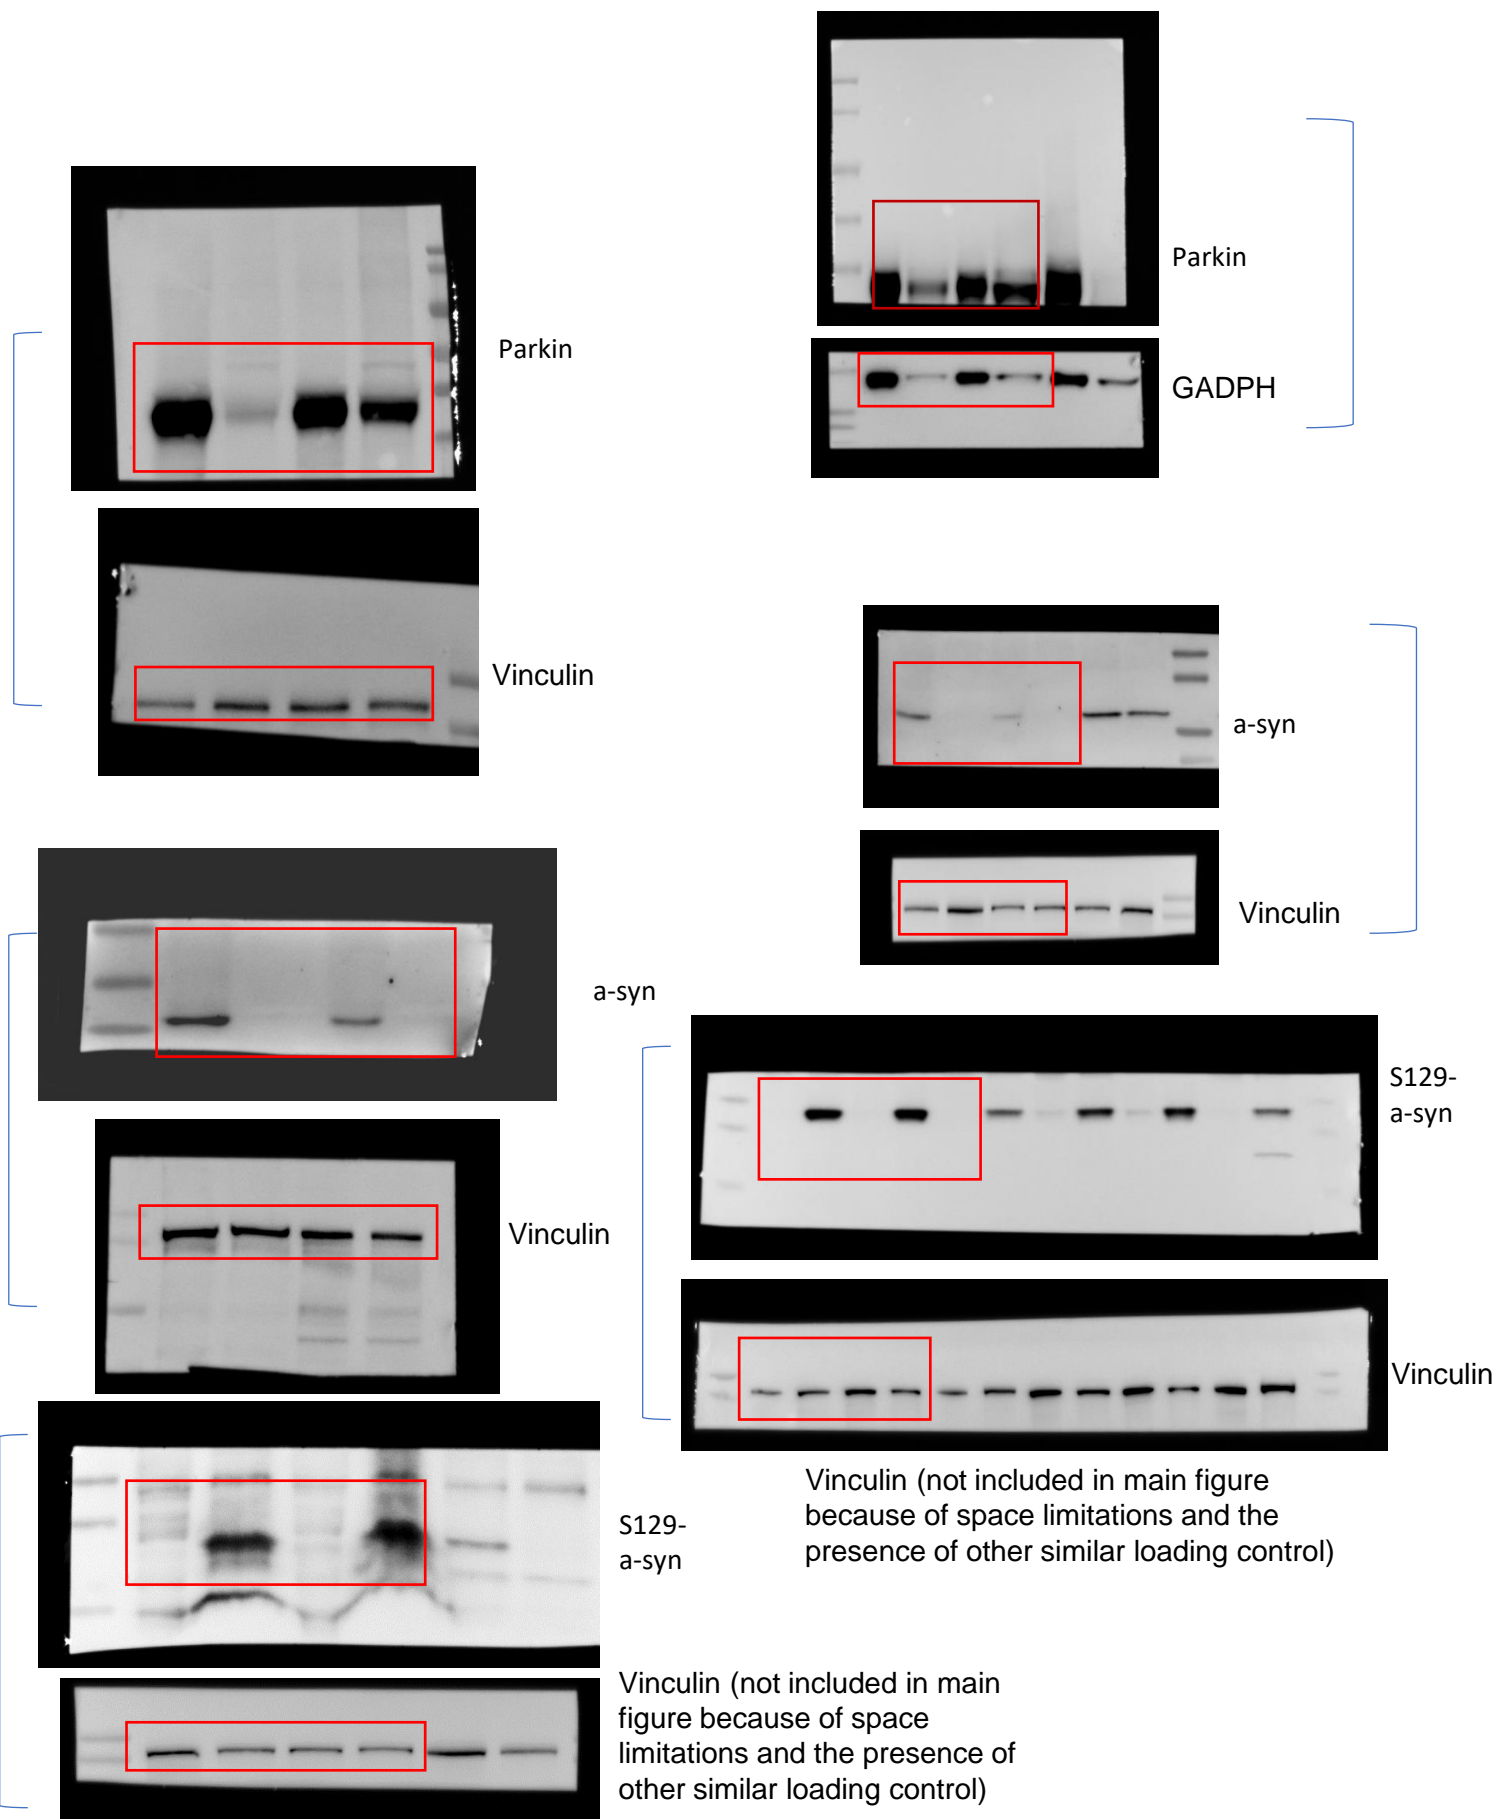

Fig. 6A

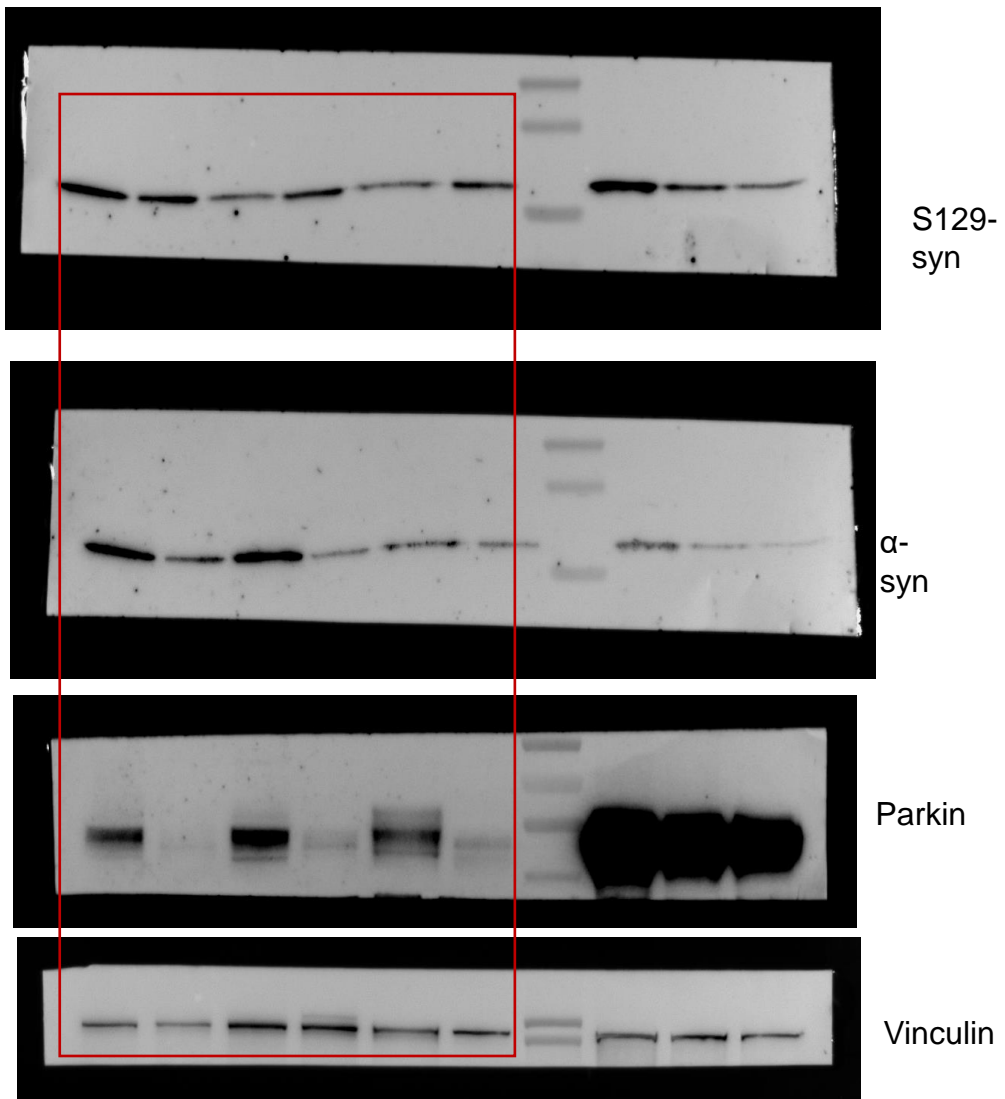

Fig. 6B

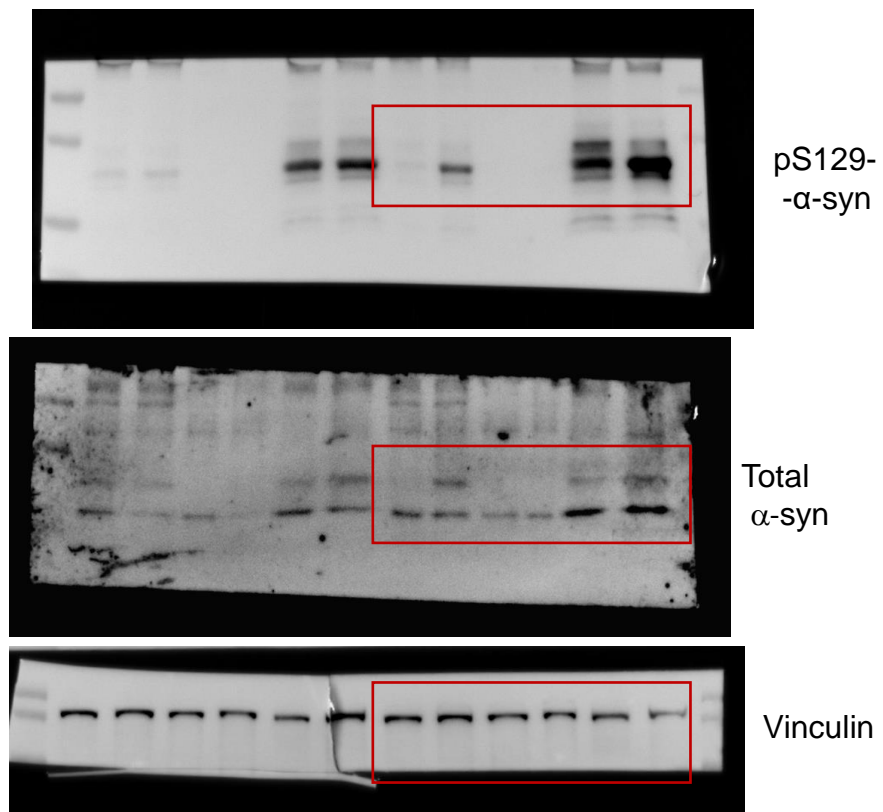

Fig. 7D

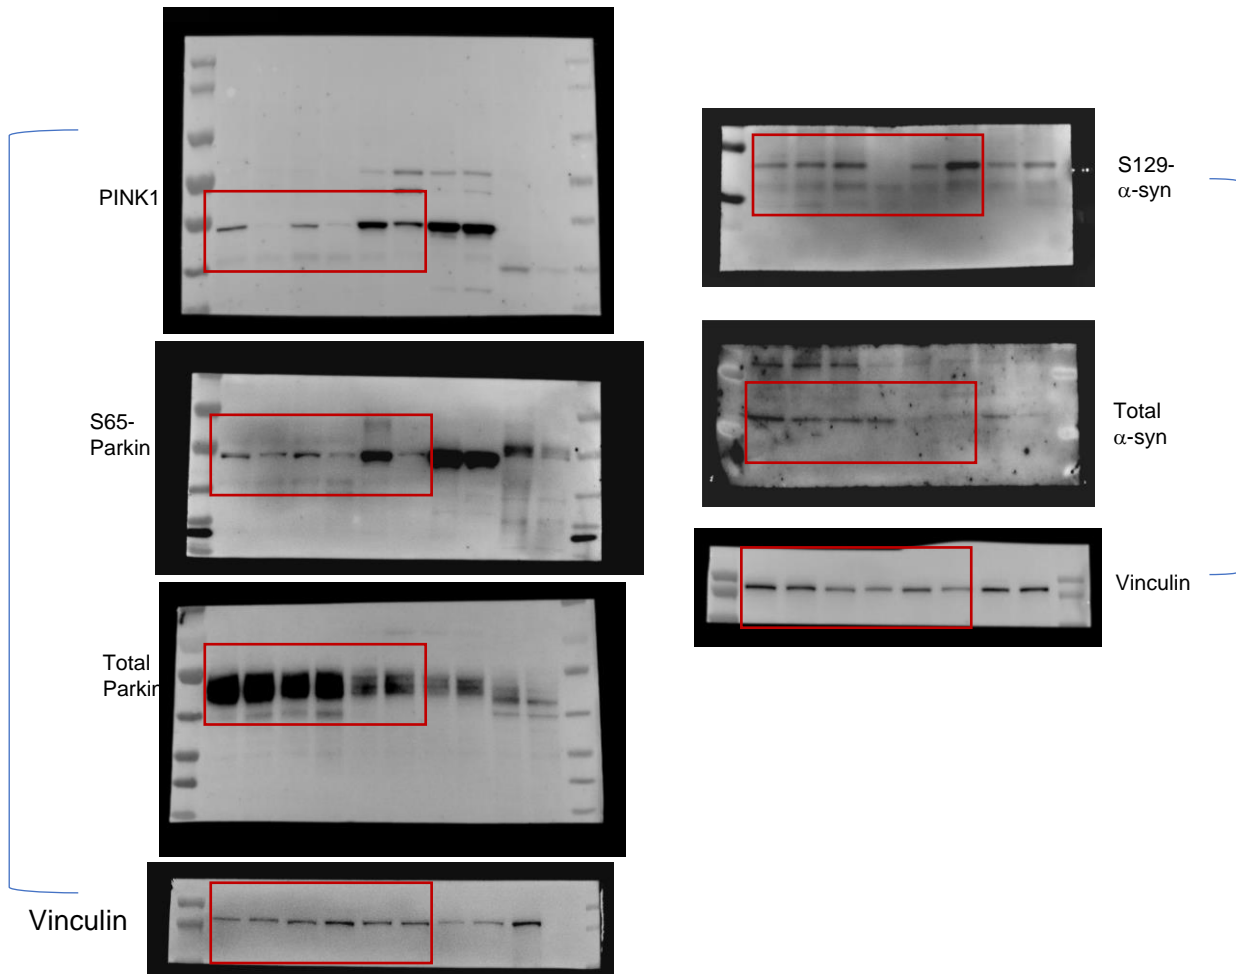

Fig. 8B

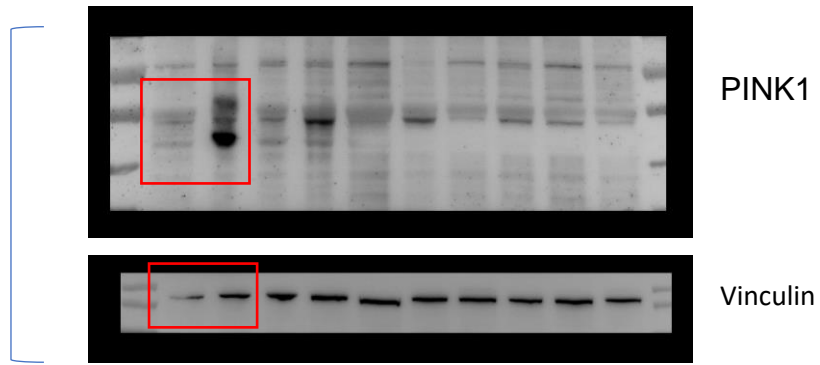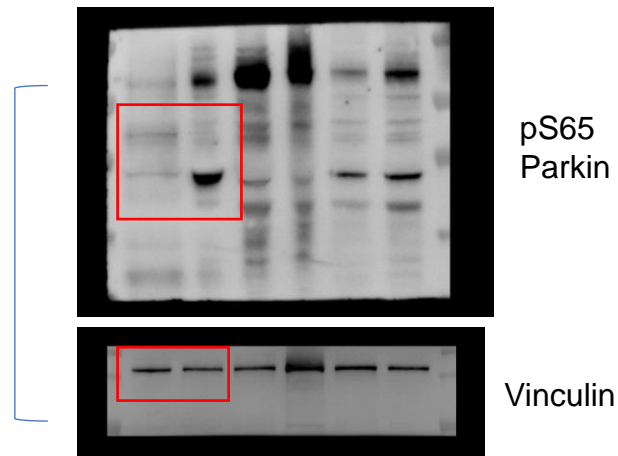

Fig. 8E

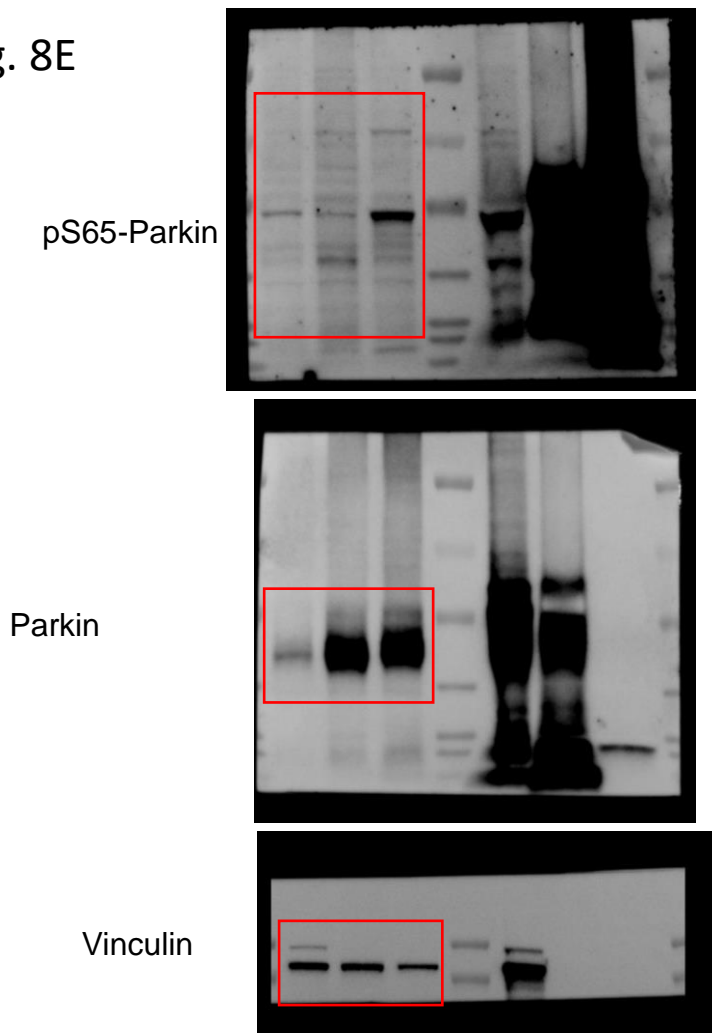

# Supplemental Figure 1

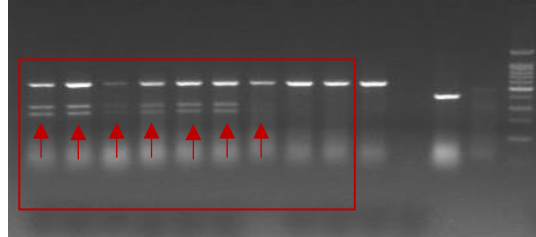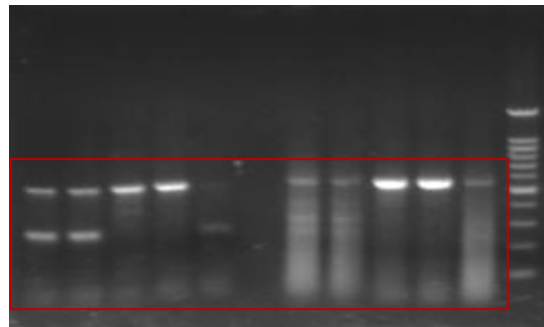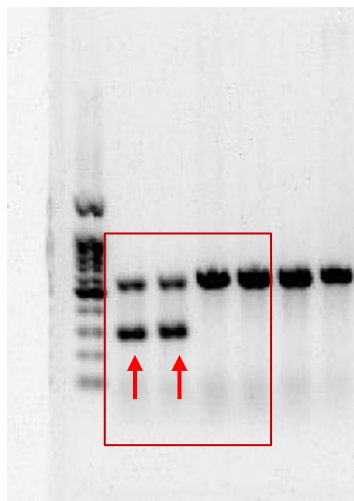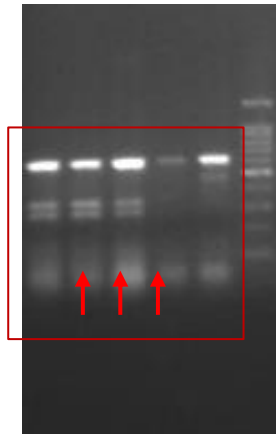

Sup Fig 3

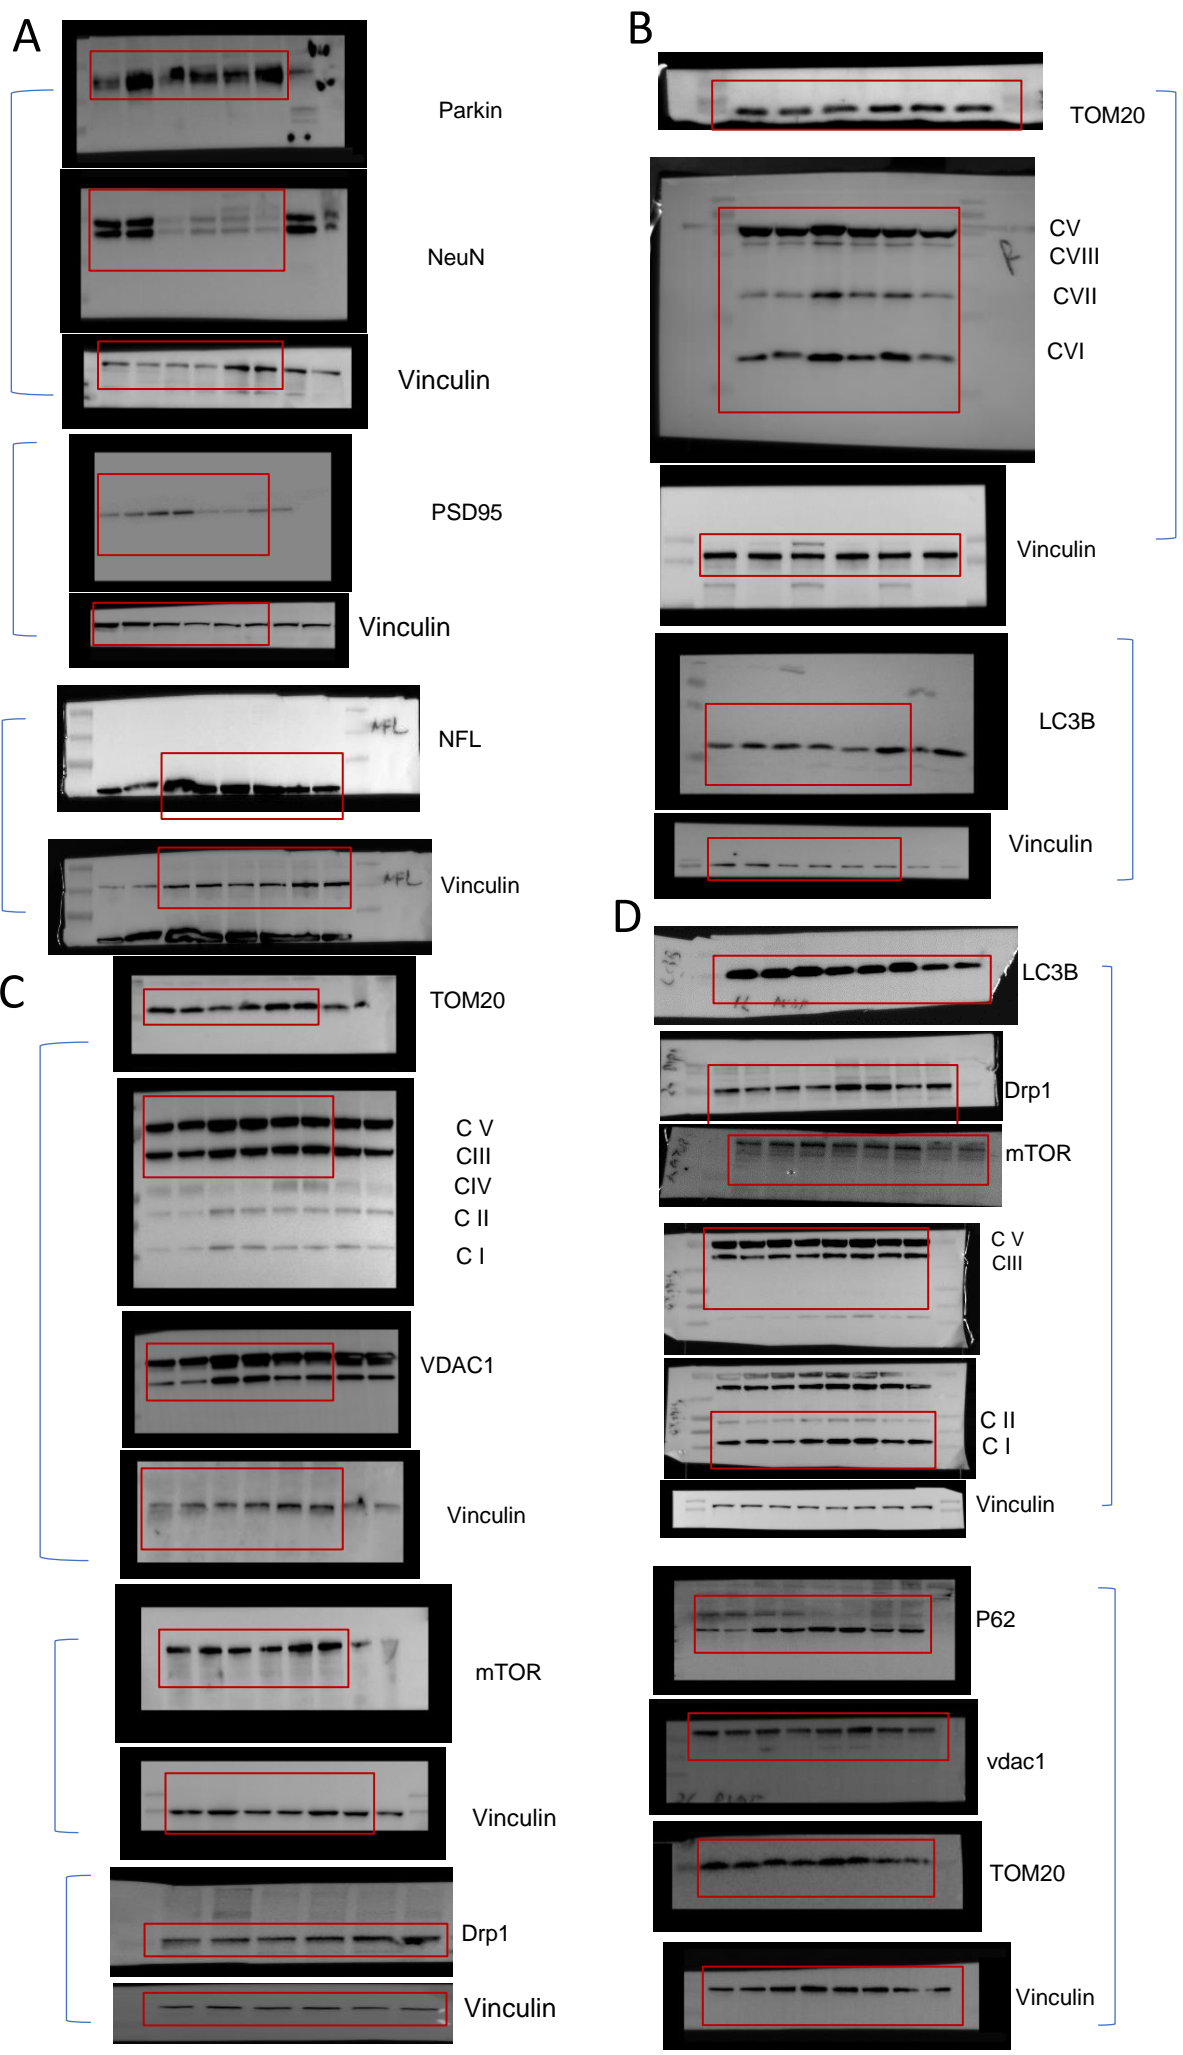

Sup Fig 5B

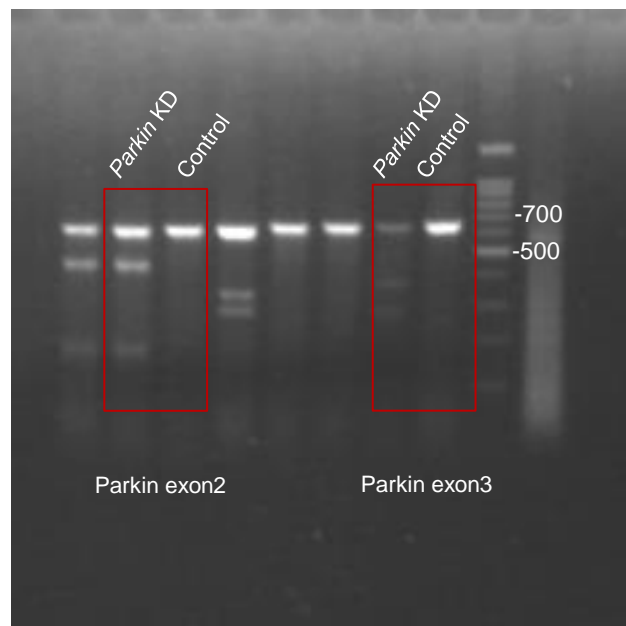

Suppl Fig 7A

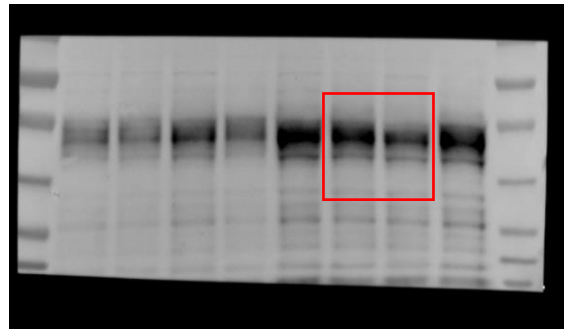

Parkin

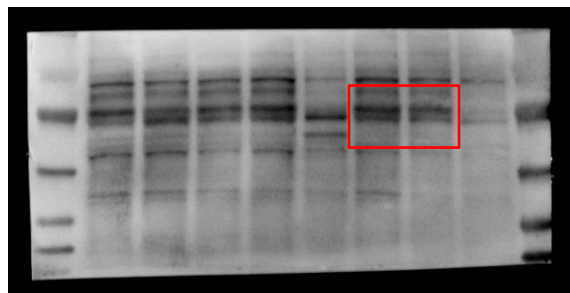

NeuN

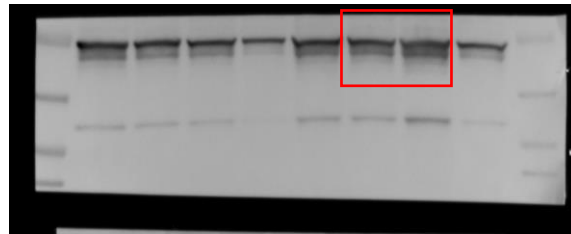

GFAP

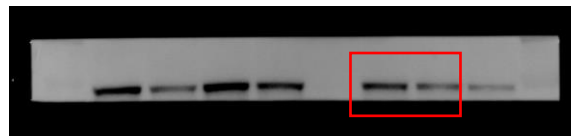

TH

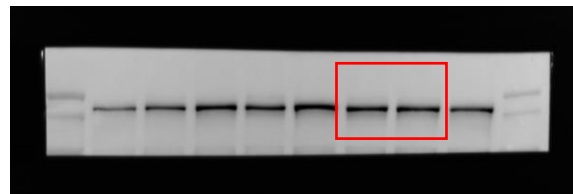

Vinculin
